# Supplementary material for: The impacts of volcanic aerosol on stratospheric ozone and the Northern Hemisphere polar vortex: separating radiative-dynamical changes from direct effects due to enhanced aerosol heterogeneous chemistry
Source: Copernicus journal article supplement (doi:10.5194/acp-15-11461-2015), 2015-10-16
Supplement: Supplementary file 1 [file acp-15-11461-2015-supplement.pdf]

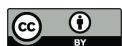

*Supplement of*

**The impacts of volcanic aerosol on stratospheric ozone and the Northern Hemisphere polar vortex: separating radiative-dynamical changes from direct effects due to enhanced aerosol heterogeneous chemistry**

**S. Muthers et al.**

*Correspondence to:* S. Muthers (muthers@climate.unibe.ch)

The copyright of individual parts of the supplement might differ from the CC-BY 3.0 licence.

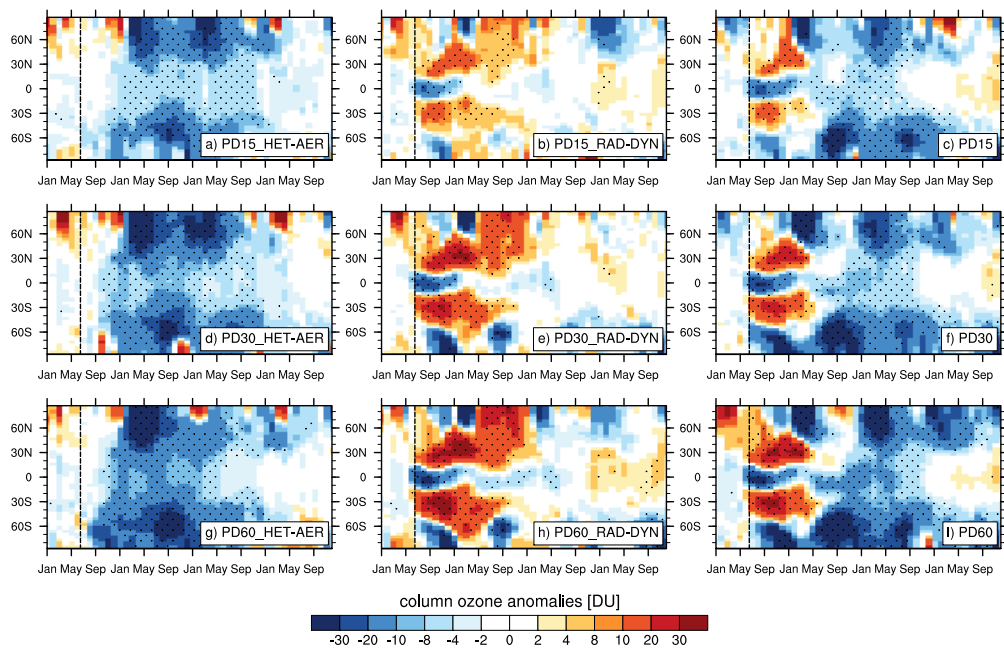

Figure S1: Similar to Figure 3 but for all experiments performed under present day climate conditions.

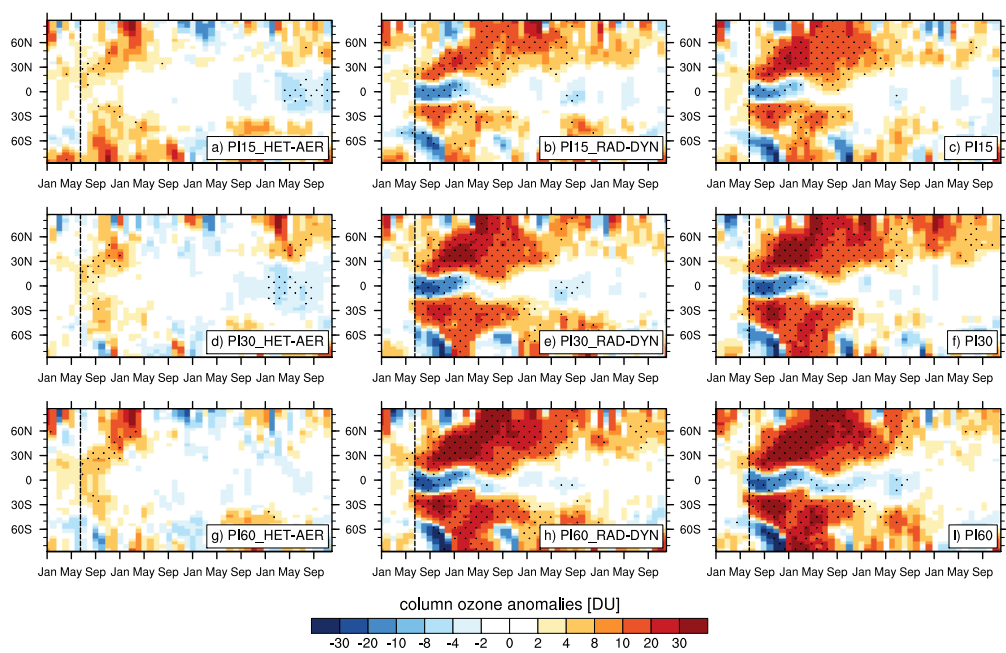

Figure S2: Similar to Figure 3 but for all experiments performed under preindustrial climate conditions.

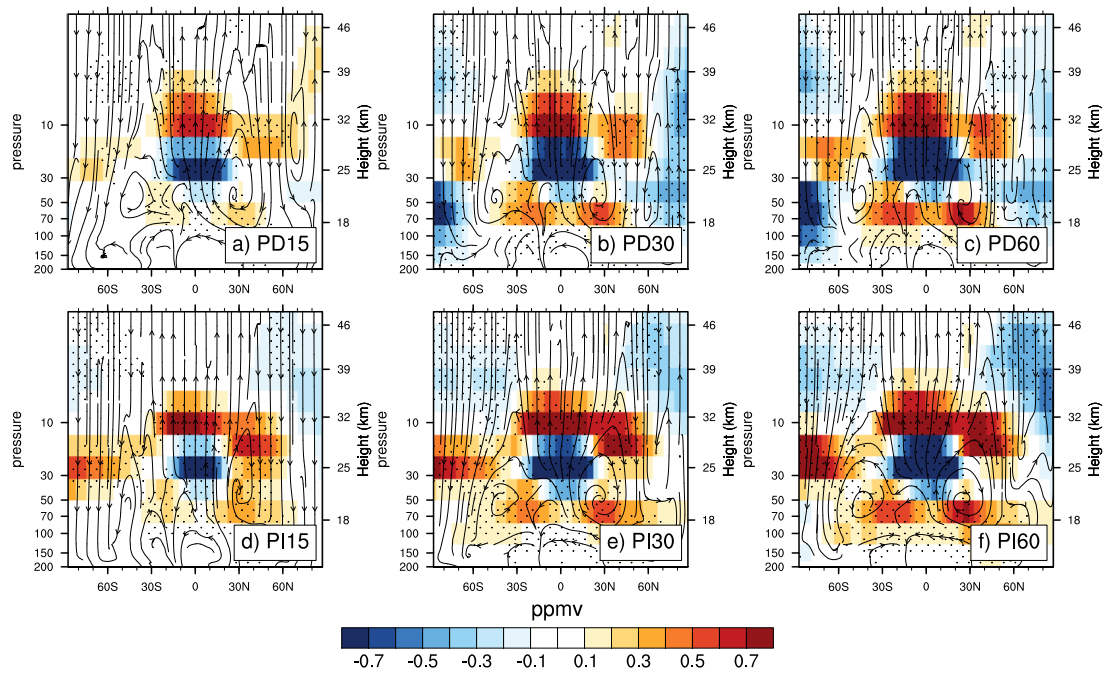

Figure S3: Similar to Figure 4 b but for (a) PD15, (b) PD30, (c) PD50, (d) PI15, (e) PI30, and (f) PI60 for the first post eruption DJF season. The streamlines show the residual circulation anomalies. Stippling indicates significant anomalies (Student's t test  $p \leq 0.05$ ).
